# Supplementary material
Source: HighWire-hosted journal article supplement (https://militaryhealth.bmj.com/highwire/filestream/150307/field_highwire_adjunct_files/0/jramc-2015-000427supp.pdf)
Supplement: jramc-2015-000427supp.pdf [file jramc-2015-000427supp.pdf]

**APPENDIX 1**

**Collective Training Group Establishment**

**Heat Illness Questionnaire**

**YOUR RANK**

Junior ranks (Pte-Cpl)  
Col)

Senior ranks (Sgt-WO1)

Commissioned Officer (2Lt-Lt)

**YOUR ROLE ON THIS EXERCISE**

Directing Staff (DS)

Battlegroup (BG)

**ABOUT YOU**

Yes No

**Have you ever been diagnosed with Heat illness (HI)?**

If YES -was this in the UK?

-did you require hospital treatment?

-were you referred for investigation  
(e.g. Institute of Naval Medicine clinic)

**Are you medically downgraded?**

**Do you regularly take any of the following? (if 'YES' provide name and how often taken):**

|                                                                 |       |              |        |         |
|-----------------------------------------------------------------|-------|--------------|--------|---------|
| Prescription medications                                        |       |              | Yes    | No      |
| .....                                                           | Daily | Twice a week | Weekly | Monthly |
| .....                                                           | Daily | Twice a week | Weekly | Monthly |
| Over-the-counter medications (e.g. Dispirit, Nurofen, Clarityn) |       |              | Yes    | No      |
| .....                                                           | Daily | Twice a week | Weekly | Monthly |
| .....                                                           | Daily | Twice a week | Weekly | Monthly |
| Sports/exercise supplements                                     |       |              | Yes    | No      |
| .....                                                           | Daily | Twice a week | Weekly | Monthly |
| .....                                                           | Daily | Twice a week | Weekly | Monthly |
| Other substances (e.g performance/recreational)                 |       |              | Yes    | No      |
| .....                                                           | Daily | Twice a week | Weekly | Monthly |
| .....                                                           | Daily | Twice a week | Weekly | Monthly |

**Are you a current smoker?** Yes No

If 'YES' how many cigarettes do you smoke per day? ..... cigarettes

**How do you judge your fitness at the moment?**

Inactive Unfit Moderately Fit Trained Well Trained

**How many times a week do you undertake physical exercise lasting at least 45 minutes?**  
(include unit PT and off-duty fitness training)

Never (0) Infrequently (1-2) Often (3-4) Frequently (5-6) Daily (7)

**Personal Fitness test**

**What was your 1.5 mile run-time in your last Personal Fitness Assessment (PFA)?**

..... mins: .....seconds:

**Have you passed a Personal Fitness Test in the last 3 months?** YES NO

If YES, specify the date of the test (best estimate) ..... 2014

**What is your Body Composition Measurement (BCM) category, if known:**

No increased risk Increased risk High risk Very high risk

Extreme risk

**What information has been provided to you concerning prevention of heat illness? (tick all boxes that apply)**

None Read JSP 539 Issued with 'A Commander's Guide to Climatic Injury'

Watched a DVD on climatic injury Issued with 'An Individual's Guide to Climatic Injury'

Received a brief by med staff/CoC

**Would you recognise possible heat illness in yourself and in others?**

Yes No Don't know

**Are you familiar with immediate first aid measures for heat illness?**

Yes No Don't know

**ABOUT THIS TRAINING EXERCISE**

**How long is it since you arrived in this country?** ..... Days

**Did you follow a programme of heat acclimatisation?** YES NO

If YES how long did the programme last? ..... Days
